# Supplementary material for: Talent Identification In Football: Different Effects of Maturation on Sprinting, Change of Direction and Jumping in 13-Year-Old Players
Source: Preprints.org preprint supplement (doi:10.20944/preprints202405.0518.v1), 2024-05-08
Supplement: Supplementary file 2 [file supplementary]

## Sheet: List1
Athlete_ID	Age	BIO_VEK	Start_Date_ID	End_Date_ID	Test_Date_ID	Measurement_ID	Gender	Date_Of_Birth	Height	Weight	Percent Body Fat	Fat Free Mass	Skeletal Muscle Mass	TT time	30 m time	30 m max 0-10	30 m max 20-30	UTJ DL3	UTJ NL3	CMJ
197	12.7	3	2020-03-02	2020-08-01	2020-03-04	1	M	2007-07-25	149	43.1	15.2	36.6	20.1	11.12	4.86	23.3	30.1	608	613	37.113
198	12.8	4	2020-03-02	2020-08-01	2020-03-04	2	M	2007-05-24	165.1	53.7	15.4	45.4	24.9	11.84	4.96	21.6	26.5	585	588	19.158
199	13.2	2	2020-03-02	2020-08-01	2020-03-05	3	M	2007-01-09	163.3	42.4	12.5	37.1	19.9	11.36	5.02	23.3	27.2	556	589	26.888
201	12.7	5	2020-03-02	2020-08-01	2020-03-04	5	M	2007-07-07	166.5	53.8	7.3	49.9	27.8	10.88	5.41	22.3	26.2	670	590	22.9765
202	12.9	3	2020-03-02	2020-08-01	2020-03-05	6	M	2007-03-12	170.7	54.2	13.4	46.9	26	12.83	5.32	20.4	25.8	547	561	25.6565
204	12.9	3	2020-03-02	2020-08-01	2020-03-04	8	M	2007-04-12	149.5	38.8	9.8	35	18.8	11.83	4.9	22.9	27.7	554	502	18.562
206	12.9	3	2020-03-02	2020-08-01	2020-03-05	10	M	2007-04-17	157	43	12.9	37.5	20	11.88	5.2	22.3	26.7	492	538	26.702
208	13.2	2	2020-03-02	2020-08-01	2020-03-04	12	M	2007-01-26	149.1	38.5	5.5	36.4	19.5	11.85	5.04	21.3	25.5	542	564	23.788
209	12.3	3	2020-03-02	2020-08-01	2020-03-05	13	M	2007-12-04	146.6	40	15.7	33.7	18.1	12.77	5.61	22.1	24	407	448	17.668
210	13	2	2020-03-02	2020-08-01	2020-03-05	14	M	2007-03-04	155	41.9	7.5	38.7	20.7	12.12	4.88	22.3	27.9	420	413	20.5305
211	12.9	4	2020-03-02	2020-08-01	2020-03-04	15	M	2007-03-31	169	53.8	11.4	47.7	26.1	11.83	5.13	22.8	27.8	601	544	22.5725
212	13.2	1	2020-03-02	2020-08-01	2020-03-05	16	M	2007-01-25	150.8	35.6	4.6	34	18.2	11.62	5.37	22.6	25.6	510	516	25.949
213	12.3	2	2020-03-02	2020-08-01	2020-03-05	17	M	2007-11-03	142	34.4	9.8	31	16.5	11.98	5.09	22.1	27.1	447	438	20.6565
214	13.2	3	2020-03-02	2020-08-01	2020-03-04	18	M	2007-01-03	160.5	45.7	10.6	40.9	22.5	11.73	5.36	23.1	27.5	609	598	24.719
216	12.6	3	2020-03-02	2020-08-01	2020-03-05	20	M	2007-08-30	154	42.3	9.2	38.4	20.8	11.52	5.13	23.9	26.9	449	473	21.761
217	12.5	3	2020-03-02	2020-08-01	2020-03-05	21	M	2007-09-07	164	45.3	8.4	41.5	22.6	11.88	5.12	21.9	26.7	575	547	24.758
219	12.4	1	2020-03-02	2020-08-01	2020-03-05	23	M	2007-10-26	145.6	36.8	10.3	33	17.6	13.05	5.03	22.5	27.6	493	389	21.157
220	13.2	3	2020-03-02	2020-08-01	2020-03-04	24	M	2007-01-10	158.5	48.3	12.8	42.1	23	12.29	5.15	21.8	26.7	515	518	20.2565
222	12.3	2	2020-03-02	2020-08-01	2020-03-05	26	M	2007-11-13	154.5	43	14	37	19.9	12.69	5.31	21.5	27.1	468	456	17.8795
223	13.1	2	2020-03-02	2020-08-01	2020-03-05	27	M	2007-02-22	154	37	6.5	34.6	18.4	12.18	4.86	22.7	29.5	561	532	28.2155
225	12.3	2	2020-03-02	2020-08-01	2020-03-05	29	M	2007-11-29	148	37.8	12.2	33.2	17.8	12.96	5.21	22.2	25.3	517	543	27.037
227	12.8	3	2020-03-02	2020-08-01	2020-03-05	31	M	2007-05-15	160.5	52.5	13.8	45.2	24.7	11.91	5.05	21.8	27.1	523	524	27.493
230	13.2	3	2020-03-02	2020-08-01	2020-03-05	34	M	2007-01-08	161.7	45.9	5.5	43.4	23.7	11.79	5.34	21.2	26.6	539	532	21.4045
231	12.3	2	2020-03-02	2020-08-01	2020-03-05	35	M	2007-11-05	152	42.4	7.4	39.3	21.5	11.44	5.13	21.8	27.2	458	473	21.848
232	12.5	4	2020-03-02	2020-08-01	2020-03-05	36	M	2007-09-07	162.9	46.9	14	40.3	21.6	12.78	4.9	22.6	26.7	488	535	23.0325
233	12.9	3	2020-03-02	2020-08-01	2020-03-04	37	M	2007-04-20	156.6	46.8	10.6	41.8	22.9	11.57	5.66	20.1	25.8	517	593	27.059
236	12.3	3	2020-03-02	2020-08-01	2020-03-04	40	M	2007-12-17	160.5	49.8	11.4	44.1	24.5	13.06	5.04	23.2	26.7	471	439	23.3515
237	12.9	3	2020-03-02	2020-08-01	2020-03-04	41	M	2007-04-09	157.7	44.8	9.8	40.4	22	12.19	5.28	22	25.7	594	569	19.5965
238	13.2	2	2020-03-02	2020-08-01	2020-03-05	42	M	2007-01-14	152.2	47	20.1	37.6	20.4	11.47	5.14	21.5	26.6	463	478	22.633
240	12.8	3	2020-03-02	2020-08-01	2020-03-05	44	M	2007-05-24	154.5	49.2	15.7	41.5	22.6	11.21	5.05	20.6	26.9	493	413	21.7595
241	13.2	1	2020-03-02	2020-08-01	2020-03-05	45	M	2007-01-25	139.3	33.6	10.4	30.1	16	11.48	5.71	21.5	24.3	521	559	27.4685
242	12.3	2	2020-03-02	2020-08-01	2020-03-04	46	M	2007-11-16	144.4	35.7	10.7	31.9	17.3	11.9	5.87	19.8	22.6	581	576	26.9045
243	13.1	1	2020-03-02	2020-08-01	2020-03-04	47	M	2007-02-23	151.5	40.6	11.3	36	19.2	11.6	5.25	21.4	24.8	538	510	28.532
244	12.6	2	2020-03-02	2020-08-01	2020-03-04	48	M	2007-10-03	155.4	38.4	8.2	35.2	18.8	11.54	4.84	22.9	29.2	585	563	25.559
246	12.4	3	2020-03-02	2020-08-01	2020-03-04	50	M	2007-10-04	160.5	48.9	11.6	43.2	23.5	10.83	5.08	22	27.6	628	610	28.294
247	12.7	3	2020-03-02	2020-08-01	2020-03-04	51	M	2007-07-04	165.2	52.7	11	46.9	25.8	12.04	4.89	21.1	27.6	571	543	20.631
248	12.9	3	2020-03-02	2020-08-01	2020-03-05	52	M	2007-04-05	153	44.4	8	40.8	22.3	11.92	5.08	22.2	27.5	478	563	23.058
250	12.3	3	2020-03-02	2020-08-01	2020-03-04	54	M	2007-11-09	160.8	47.7	7.1	44.3	24.6	11.44	5.35	20.1	25.7	547	541	28.621
251	13.2	3	2020-03-02	2020-08-01	2020-03-04	55	M	2007-01-22	160.4	51.2	14.9	43.6	23.9	12.31	5.05	23.3	28.1	545	519	19.838
252	12.4	3	2020-03-02	2020-08-01	2020-03-04	56	M	2007-10-03	154.5	41.6	10.4	37.3	20.1	12.22	4.9	20.7	26.3	547	526	28.266
253	12.6	3	2020-03-02	2020-08-01	2020-03-04	57	M	2007-08-21	160.9	43.6	8.2	40	21.8	11.5	5.31	21.3	24.4	555	581	24.554
254	12.8	3	2020-03-02	2020-08-01	2020-03-04	58	M	2007-05-20	155.1	45.4	7.5	42	22.8	11.74	5.43	21.2	25.6	521	529	24.8155
255	12.8	5	2020-03-02	2020-08-01	2020-03-04	59	M	2007-05-20	172	66	7.8	60.9	34.2	11.46	5.12	21.6	25.4	539	503	24.5435
256	13.2	3	2020-03-02	2020-08-01	2020-03-04	60	M	2007-01-19	156.5	41.1	9.4	37.2	20.2	11.88	5.4	21.1	24.7	507	529	24.7685
258	12.3	3	2020-03-02	2020-08-01	2020-03-04	62	M	2007-12-25	152.1	38.9	7.7	35.9	19.4	11.34	4.93	22.3	28.2	570	591	32.241
259	12.8	2	2020-03-02	2020-08-01	2020-03-04	63	M	2007-05-20	148.9	38	10.5	34	18	11.47	5.14	21	25.1	469	509	26.767
260	12.8	4	2020-03-02	2020-08-01	2020-03-04	64	M	2007-06-26	172.8	54.1	6.2	50.7	28.7	11.79	4.91	20.3	29.3	677	700	36.0905
261	12.3	1	2020-03-02	2020-08-01	2020-03-04	65	M	2007-12-08	141	32.5	10.4	29.1	15.3	12.42	5.3	21.1	25.8	507	474	23.3135
262	13.1	3	2020-03-02	2020-08-01	2020-03-04	66	M	2007-02-12	158.9	49	16.6	40.9	22.2	11.85	5.48	20.7	25.5	546	600	28.622
263	12.9	5	2020-03-02	2020-08-01	2020-03-05	67	M	2007-04-12	173.5	53.3	4.8	50.7	28.4	11.2	4.93	22	27.4	594	596	28.85
367	12.5	1	2020-03-02	2020-08-01	2020-06-17	69	M	2007-12-22	148	38.5	16.6	32.1	17.2	12.35	5.11	22.9	26.4	551	560	27.7405
368	14.1	2	2020-03-02	2020-08-01	2020-06-17	70	M	2006-05-04	160	44.2	7.7	40.8	22.1	11.17	5.2	21.8	24.9	595	562	24.417
369	14	3	2020-03-02	2020-08-01	2020-06-17	71	M	2006-06-01	180.5	59.6	7.9	54.9	31	10.49	4.45	20.8	32	704	734	29.2985
370	12.9	3	2020-03-02	2020-08-01	2020-06-17	72	M	2007-07-17	165.5	47	12.7	41	22.5	11.38	4.89	23.1	28.5	564	541	25.3795
371	13.3	3	2020-03-02	2020-08-01	2020-06-17	73	M	2007-02-06	165	49.1	6.1	46.1	25.4	11.76	5.4	20.3	24.6	571	511	25.031
372	12.7	2	2020-03-02	2020-08-01	2020-06-17	74	M	2007-10-23	150.5	46.1	26.7	33.8	18.2	12.93	6.04	19.3	22.4	384	348	16.736
738	17.3	3	2020-07-20	2020-07-21	2020-07-20	79	M	2003-03-13	188	77.2	7.3	71.6	40.7	10.24	4.5	21.9	31.4	770	786	35.75
942	12.8	2	2020-10-05	2020-10-06	2020-10-05	1351	M	2007-12-31	149.4	38.1	11.2	33.8	18.1	14	5.37	21	24.7	511	469	25.1835
951	15.8	3	2020-12-14	2020-12-15	2020-12-14	1391	M	2005-02-17	177	67.5	8	62.1	35.9	10.67	4.07	24.1	33.5	729	748	36.2085
953	9.7	3	2020-12-14	2020-12-15	2020-12-14	1393	M	2011-04-18	145.9	48.1	24.9	36.1	19.6	13.03	5.47	20.1	22.9	443	364	19.29
954	17.6	3	2021-01-02	2021-01-03	2021-01-02	1394	M	2003-06-13	186	70.8	9	64.4	36.9	11.49	4.32	23.5	30.8	676	663	37.249
970	14.6	2	2021-05-04	2021-05-05	2021-05-04	1410	M	2006-10-12	170	53.4	8	49.1	27.4	11.37	4.64	22.5	28.4	544	608	25.5145
307	14.9	3	2021-05-04	2021-05-05	2021-05-04	1411	M	2006-06-04	176	68.3	15.8	57.5	32.6	10.36	4.59	23.5	30	612	629	30.997
971	13.2	2	2021-05-17	2021-05-19	2021-05-17	1412	M	2008-03-01	158.6	40.7	10.2	36.6	19.5	11.66	4.88	23.1	27.1	600	584	27.256
972	12.8	3	2021-05-17	2021-05-19	2021-05-17	1413	M	2008-08-18	159.3	55.2	25.7	41	22.4	11.56	5.05	22.1	26.9	583	580	28.7715
973	13.1	4	2021-05-17	2021-05-19	2021-05-17	1414	M	2008-04-20	170.6	53.2	6.1	49.9	27.7	11.86	4.9	23.1	27.2	560	620	19.7535
974	12.5	3	2021-05-17	2021-05-19	2021-05-17	1415	M	2008-11-12	156.5	43.6	11.6	38.5	21	11.55	4.95	22.2	26.7	561	590	23.7905
975	13.3	5	2021-05-17	2021-05-19	2021-05-17	1416	M	2008-01-06	178.1	64.9	11.2	57.6	32.3	11.85	4.88	22.8	27.3	569	617	28.0455
976	12.5	2	2021-05-17	2021-05-19	2021-05-17	1417	M	2008-12-26	147.1	34.3	11	30.5	16.1	13.24	5.17	21.5	25.3	491	485	20.569
977	13.2	4	2021-05-17	2021-05-19	2021-05-17	1418	M	2008-03-23	171.3	56.6	11.7	50	27.6	12.2	4.91	21.1	27	549	585	27.0695
978	13.3	2	2021-05-17	2021-05-19	2021-05-17	1419	M	2008-01-16	150.7	38.8	19.5	31.2	16.5	12.86	5.67	20.1	23.4	499	510	23.6425
979	13.1	4	2021-05-17	2021-05-19	2021-05-17	1420	M	2008-04-26	168.6	60.7	18.8	49.3	27.3	13.42	4.94	22.4	26.3	512	420	24.7745
980	13.3	3	2021-05-17	2021-05-19	2021-05-17	1421	M	2008-02-11	159.8	45.7	12	40.2	21.9	12.84	5.28	21.2	24.4	500	532	25.666
981	13.2	1	2021-05-17	2021-05-19	2021-05-17	1422	M	2008-03-05	153.8	34.4	10.2	30.9	16.2	13.32	5.11	21.8	25.8	534	552	23.24
982	12.8	2	2021-05-17	2021-05-19	2021-05-17	1423	M	2008-07-29	151	38.2	13.3	33.1	17.8	13.06	5.4	20	24.2	548	560	24.4575
983	12.8	5	2021-05-17	2021-05-19	2021-05-17	1424	M	2008-07-26	177.4	51.8	8.1	47.6	26.3	12.53	5.07	21.3	26.2	504	533	21.1115
984	13.3	4	2021-05-17	2021-05-19	2021-05-17	1425	M	2008-01-13	162.1	55.8	15.5	47.2	26	12.45	5.2	21.8	25.6	576	569	19.8375
985	13.3	2	2021-05-17	2021-05-19	2021-05-17	1426	M	2008-02-08	157.6	38.8	9	35.3	19.1	13.08	5.62	19.7	22.6	444	446	19.1325
986	13.2	3	2021-05-17	2021-05-19	2021-05-17	1427	M	2008-03-20	158.3	43.6	12.9	38	20.7	12.7	5.23	22.2	25.2	541	542	27.541
987	12.6	2	2021-05-17	2021-05-19	2021-05-17	1428	M	2008-10-27	151	35.5	10.4	31.8	16.9	13.59	5.32	22	23.7	458	482	23.8935
988	12.8	2	2021-05-17	2021-05-19	2021-05-17	1429	M	2008-08-31	149.9	38.3	13.6	33.1	17.6	12.59	5.25	21.3	23.5	506	501	30.3075
989	13.3	4	2021-05-17	2021-05-19	2021-05-17	1430	M	2008-02-19	166.5	56.1	15.5	47.4	26.2	12.31	4.77	23.4	27.1	570	538	28.1325
990	12.9	3	2021-05-17	2021-05-19	2021-05-17	1431	M	2008-06-03	163.6	43.5	14.9	37	19.7	11.7	4.9	22.4	26.2	604	572	26.5495
991	12.9	3	2021-05-17	2021-05-19	2021-05-17	1432	M	2008-06-09	156.9	42.6	14.7	36.3	19.5	11.65	5.07	21.5	26.1	552	560	22.4995
992	12.6	4	2021-05-17	2021-05-19	2021-05-18	1433	M	2008-10-24	150.7	40.1	11.4	35.5	19.3	13.36	4.82	22.2	26.2	576	530	31.7285
993	13.2	3	2021-05-17	2021-05-19	2021-05-18	1434	M	2008-03-21	163.7	53.6	11	47.7	26.4	12.18	4.96	22.2	26.8	500	576	24.235
994	12.4	3	2021-05-17	2021-05-19	2021-05-18	1435	M	2008-12-14	150.8	39.6	10.7	35.4	19	11.69	4.94	21.2	26.2	592	602	29.5275
995	13.3	2	2021-05-17	2021-05-19	2021-05-18	1436	M	2008-02-16	155.7	41.8	6.2	39.2	21.5	11.56	5.17	21.5	25.8	571	582	31.9935
996	13.3	3	2021-05-17	2021-05-19	2021-05-18	1437	M	2008-01-11	160.9	45.8	13.1	39.8	21.7	11.59	4.94	21.1	25.6	557	539	24.1945
997	12.9	2	2021-05-17	2021-05-19	2021-05-18	1438	M	2008-06-09	150.9	37.3	9.9	33.6	18.1	11.85	5.09	21.8	25.6	541	578	23.9525
998	13.3	3	2021-05-17	2021-05-19	2021-05-18	1439	M	2008-01-01	158.4	44.7	8.3	41	22.6	11.4	4.85	22.5	26.5	600	564	26.8915
999	13.1	2	2021-05-17	2021-05-19	2021-05-18	1440	M	2008-04-07	154.6	42.7	18.3	34.9	18.7	11.43	5.14	22.2	24.7	571	563	24.102
1000	13.3	4	2021-05-17	2021-05-19	2021-05-18	1441	M	2008-01-29	169.9	56.3	10.5	50.4	28	11.51	4.66	23.3	27.9	609	657	28.4205
1001	12.9	3	2021-05-17	2021-05-19	2021-05-18	1442	M	2008-06-06	158.5	44.1	12.3	38.7	20.9	11.6	5.51	22.7	28.6	589	591	23.195
1002	12.8	5	2021-05-17	2021-05-19	2021-05-18	1443	M	2008-08-12	168.9	56.5	19.3	45.6	25.3	13.01	5.44	20	23.3	493	457	20.5285
1003	13.3	2	2021-05-17	2021-05-19	2021-05-18	1444	M	2008-02-15	157.4	39.7	11.7	35	19	12.51	4.94	21.3	26.5	491	457	21.236
1004	12.8	2	2021-05-17	2021-05-19	2021-05-18	1445	M	2008-07-12	156.5	39	4.7	37.2	20.5	12.84	4.86	22	26.8	505	558	33.597
1055	17.3	3	2021-08-03	2021-08-04	2021-08-03	1503	M	2004-04-29	192.8	77.6	9.2	70.5	40.2	10.01	4.28	22	26.3	805	834	35.616
